# Supplementary material for: Pseudomonas aeruginosa isolation is an important predictor for recurrent hemoptysis after bronchial artery embolization in patients with idiopathic bronchiectasis: a multicenter cohort study
Source: Springer Nature journal article supplement (doi:10.1186/s12931-023-02391-9), 2023-03-18
Supplement: MOESM1 [file 24641006]

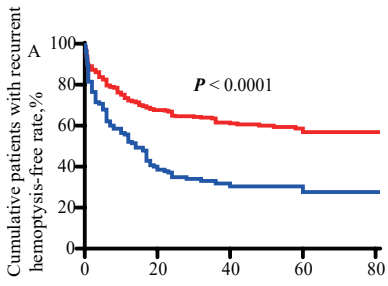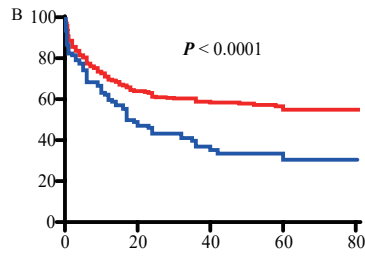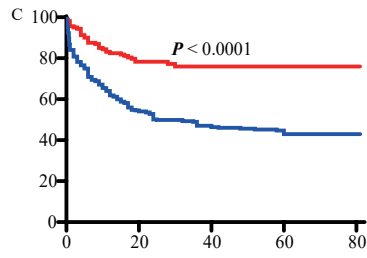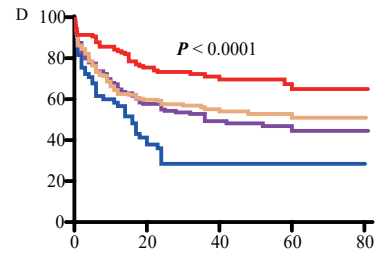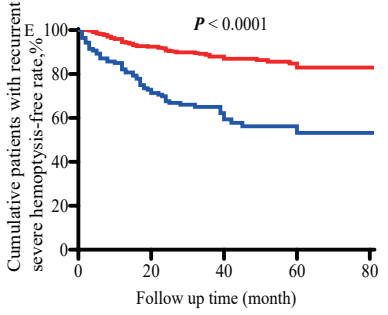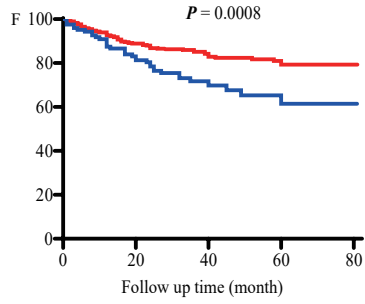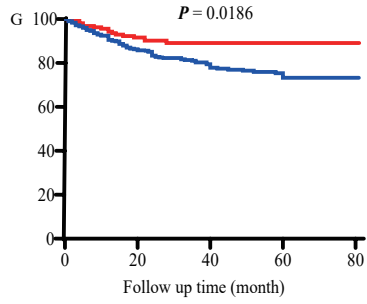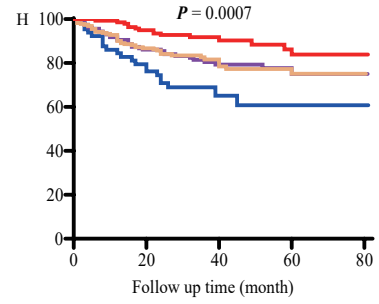

— With *P. aeruginosa*  
— Without *P. aeruginosa*

— With abnormal AbBAs on CTA  
— Without abnormal AbBAs on CTA

— Bronchiectatic lobes  $\geq 3$   
— Bronchiectatic lobes  $< 3$

— Minimal  
— Few  
— Medium  
— Massive
