# Supplementary material for: Pseudomonas aeruginosa isolation is an important predictor for recurrent hemoptysis after bronchial artery embolization in patients with idiopathic bronchiectasis: a multicenter cohort study
Source: Springer Nature journal article supplement (doi:10.1186/s12931-023-02391-9), 2023-03-18

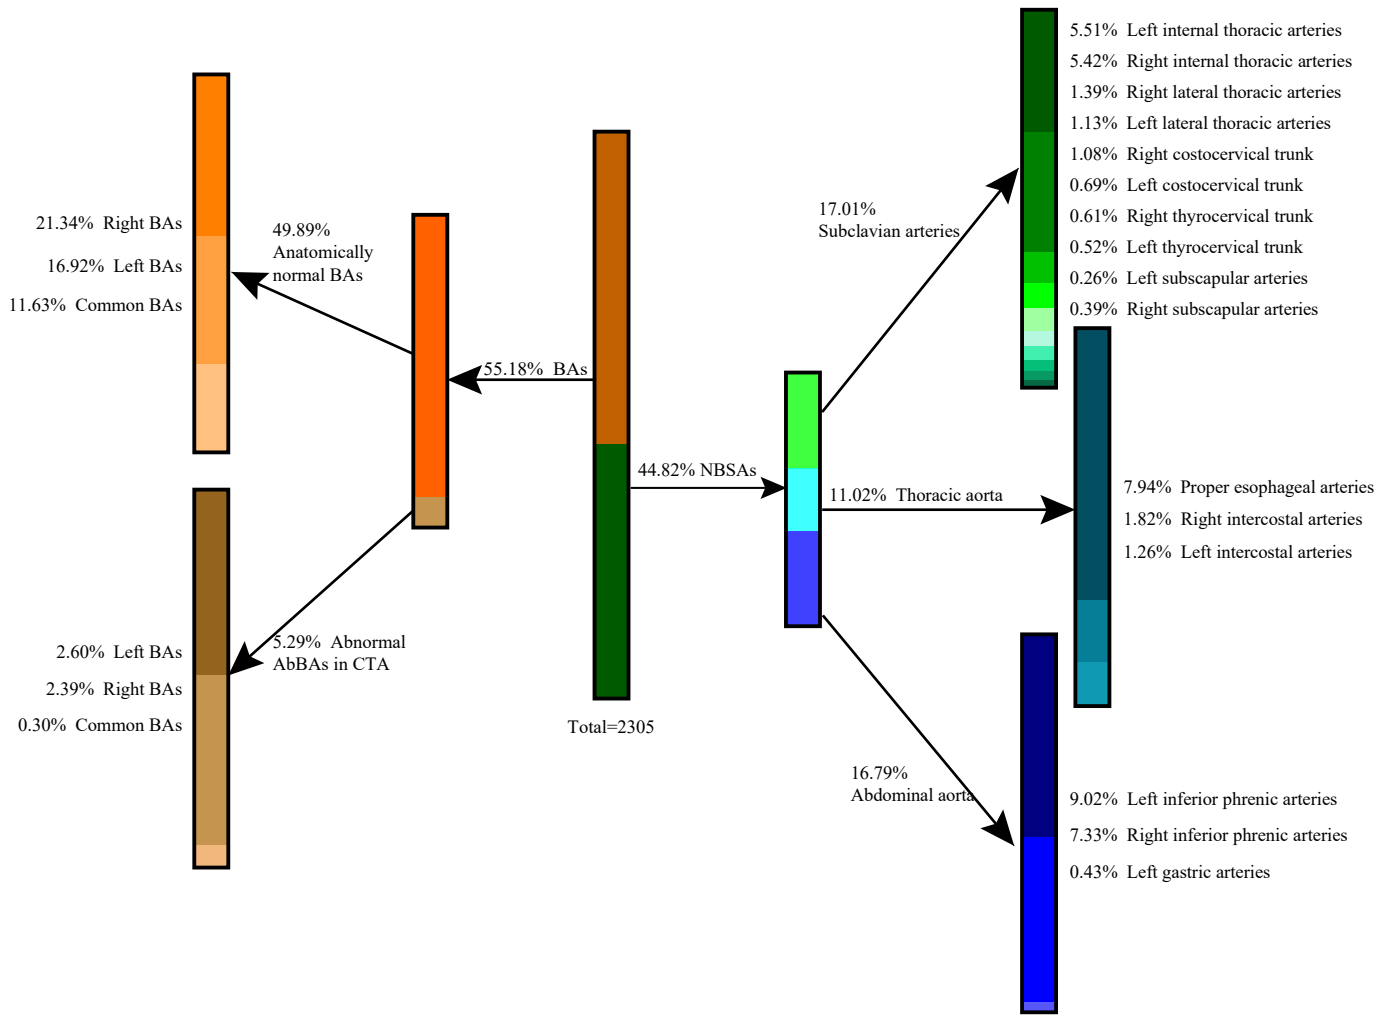

Supplement: MOESM2 [file 24641006]
